# Supplementary material for: Altered platelet proteome in lupus anticoagulant (LA)-positive patients—protein disulfide isomerase and NETosis as new players in LA-related thrombosis
Source: PubMed Central journal article supplement (PMC7000701; doi:10.1038/s12276-019-0358-4), 2020-01-20
Supplement: 12276_2019_358_MOESM1_ESM.pdf [file 12276_2019_358_MOESM1_ESM.pdf]

**Altered platelet proteome in lupus anticoagulant (LA)-positive patients –  
Protein disulfide-isomerase and NETosis as new players in LA-related  
thrombosis**

**Authors:**

Lena Hell<sup>1</sup>, Kristina Lurger<sup>1</sup>, Lisa-Marie Mauracher<sup>1</sup>, Ella Grilz<sup>1</sup> Christina Maria Reumiller<sup>2</sup>,  
Georg Johannes Schmidt<sup>3</sup>, Huriye Ercan<sup>1</sup>, Silvia Koder<sup>1</sup>, Alice Assinger<sup>2</sup>, José Basilio<sup>2</sup>,  
Johanna Gebhart<sup>1</sup>, Cihan Ay<sup>1</sup>, Ingrid Pabinger<sup>1\*</sup> and Maria Zellner<sup>2\*</sup>

**Supplementary Information**

Within the Supplementary Information the authors provide more detailed data shown in tables and figures. Tables provide more detailed information on altered platelet proteins and additional statistical evaluations. Figures show STRING pathway analysis of altered platelet proteins as well as confirmatory Western Blot analysis of P4HB and SERPINB1.

## Supplementary Tables:

**Supplementary Table 1: Altered platelet proteins between LA+TE+ patients, LA+TE- patients and healthy controls analyzed by 2D-DIGE.** Differentially regulated proteins were considered significant when fold change differed for at least 10% and the p-value was  $\leq 0.05$ . A fold change above 1 indicates that the protein is increased, whereas a fold change below 1 indicates that the protein is decreased in the first stated group.

| Protein name                             | Gene name | Uniprot Number. | Isoelectric point | One-way ANOVA [unadjusted] | One-way ANOVA [adjusted] | LA+TE+/Healthy      |                      |                    | LA+TE+/LA+TE-       |                      |                    | LA+TE-/Healthy      |                      |                    |
|------------------------------------------|-----------|-----------------|-------------------|----------------------------|--------------------------|---------------------|----------------------|--------------------|---------------------|----------------------|--------------------|---------------------|----------------------|--------------------|
|                                          |           |                 |                   |                            |                          | Average fold change | p-value [unadjusted] | p-value [adjusted] | Average fold change | p-value [unadjusted] | p-value [adjusted] | Average fold change | p-value [unadjusted] | p-value [adjusted] |
| 60 kDa heat shock protein                | HSPD1     | P10809          | 5.34              | 0.003700                   | 0.011500                 | 1.05                | 0.067400             | 0.098854           | 1.14                | 0.001229             | 0.004158           | 0.93                | 0.039915             | 0.092435           |
| 78 kDa glucose-regulated protein         | HSPA5     | P11021          | 5.00              | 0.007480                   | 0.018600                 | 1.13                | 0.038829             | 0.063276           | 1.27                | 0.003044             | 0.007441           | 0.88                | 0.116920             | 0.215470           |
| 78 kDa glucose-regulated protein         | HSPA5     | P11021          | 5.07              | 0.000767                   | 0.006000                 | 1.06                | 0.024083             | 0.042386           | 1.14                | 0.000293             | 0.002148           | 0.93                | 0.030787             | 0.079684           |
| 78 kDa glucose-regulated protein         | HSPA5     | P11021          | 5.06              | 0.000214                   | 0.004660                 | 1.13                | 0.000360             | 0.003172           | 1.17                | 0.001137             | 0.004158           | 0.97                | 0.512009             | 0.577651           |
| Actin                                    | ACTB      | P60709          | 5.79              | 0.001430                   | 0.006100                 | 1.18                | 0.151055             | 0.189898           | 0.51                | 0.015110             | 0.023332           | 2.31                | 0.000238             | 0.010472           |
| Albumin                                  | ALB       | P02768          | 5.80              | 0.018300                   | 0.031200                 | 0.94                | 0.296373             | 0.318059           | 0.79                | 0.011837             | 0.020032           | 1.20                | 0.058425             | 0.128535           |
| Albumin                                  | ALB       | P02768          | 5.88              | 0.000823                   | 0.006000                 | 0.93                | 0.165948             | 0.202826           | 0.74                | 0.000154             | 0.001359           | 1.26                | 0.002706             | 0.021971           |
| Albumin                                  | ALB       | P02768          | 6.00              | 0.001060                   | 0.006000                 | 0.88                | 0.033324             | 0.056395           | 0.78                | 0.000495             | 0.003115           | 1.15                | 0.035448             | 0.086651           |
| Albumin                                  | ALB       | P02768          | 5.96              | 0.000380                   | 0.004730                 | 0.91                | 0.071570             | 0.101583           | 0.74                | 0.000051             | 0.001133           | 1.24                | 0.002886             | 0.021971           |
| Apolipoprotein A-I                       | APOA1     | P02647          | 5.33              | 0.037000                   | 0.046700                 | 0.86                | 0.003393             | 0.011658           | 0.90                | 0.139776             | 0.161845           | 0.96                | 0.438298             | 0.561718           |
| ATP synthase subunit beta                | ATP5B     | P06576          | 5.07              | 0.035200                   | 0.045700                 | 1.09                | 0.672376             | 0.688013           | 1.11                | 0.018637             | 0.027335           | 0.98                | 0.029898             | 0.079684           |
| Bridgin integrator 2                     | BIN2      | Q9UBW5          | 5.90              | 0.000138                   | 0.004660                 | 0.86                | 0.292033             | 0.318059           | 1.29                | 0.041152             | 0.058409           | 0.67                | 0.002996             | 0.021971           |
| Calreticulin                             | CALR      | P27797          | 4.29              | 0.000057                   | 0.004660                 | 1.10                | 0.000210             | 0.003074           | 1.15                | 0.000151             | 0.001359           | 0.96                | 0.266406             | 0.404202           |
| Calreticulin                             | CALR      | P27797          | 4.29              | 0.001310                   | 0.006000                 | 1.10                | 0.003853             | 0.011790           | 1.16                | 0.001100             | 0.004158           | 0.94                | 0.226899             | 0.369761           |
| Chloride intracellular channel protein 1 | CLIC1     | O00299          | 5.32              | 0.003360                   | 0.011500                 | 0.60                | 0.200754             | 0.226491           | 0.23                | 0.000768             | 0.004014           | 2.67                | 0.008681             | 0.031830           |
| Fermitin family homolog 3                | FERMT3    | Q86UX7          | 5.88              | 0.004590                   | 0.013500                 | 0.90                | 0.009305             | 0.018610           | 1.07                | 0.447489             | 0.468798           | 0.76                | 0.004215             | 0.026494           |
| Fibrinogen beta chain                    | FGB       | P02675          | 6.47              | 0.003570                   | 0.011500                 | 1.21                | 0.002842             | 0.011658           | 1.01                | 0.870649             | 0.870649           | 1.19                | 0.008621             | 0.031830           |
| Fibrinogen beta chain                    | FGB       | P02675          | 6.45              | 0.021800                   | 0.033300                 | 1.31                | 0.004326             | 0.011790           | 1.29                | 0.134413             | 0.161845           | 1.02                | 0.422750             | 0.561718           |
| Fibrinogen beta chain                    | FGB       | P02675          | 6.70              | 0.026100                   | 0.037200                 | 1.27                | 0.005865             | 0.013583           | 1.30                | 0.137674             | 0.161845           | 0.98                | 0.509137             | 0.577651           |
| Fibrinogen beta chain                    | FGB       | P02675          | 5.68              | 0.004670                   | 0.013500                 | 1.09                | 0.014010             | 0.026801           | 1.13                | 0.008581             | 0.015102           | 0.97                | 0.403286             | 0.561718           |

|                                                      |          |        |      |          |          |      |          |          |      |          |          |      |          |          |
|------------------------------------------------------|----------|--------|------|----------|----------|------|----------|----------|------|----------|----------|------|----------|----------|
| Heat shock protein HSP 90-alpha                      | HSP90AA1 | P07900 | 5.10 | 0.001290 | 0.006000 | 1.10 | 0.000333 | 0.003172 | 1.06 | 0.101169 | 0.130924 | 1.04 | 0.225539 | 0.369761 |
| Integrin alpha-6                                     | ITGA6    | P23229 | 5.05 | 0.001470 | 0.006100 | 0.88 | 0.006360 | 0.013992 | 0.81 | 0.000912 | 0.004014 | 1.10 | 0.122257 | 0.215470 |
| Integrin alpha-6                                     | ITGA6    | P23229 | 5.09 | 0.009920 | 0.021100 | 0.89 | 0.004614 | 0.011790 | 0.85 | 0.003881 | 0.008132 | 1.06 | 0.377881 | 0.554226 |
| Integrin alpha-6                                     | ITGA6    | P23229 | 5.13 | 0.002060 | 0.008100 | 0.89 | 0.004450 | 0.011790 | 0.84 | 0.001544 | 0.004530 | 1.07 | 0.249628 | 0.392273 |
| Integrin alpha-6                                     | ITGA6    | P23229 | 5.12 | 0.005320 | 0.014900 | 0.89 | 0.003308 | 0.011658 | 0.88 | 0.015378 | 0.023332 | 1.01 | 0.816584 | 0.855469 |
| Leukocyte elastase inhibitor                         | SERPINB1 | P30740 | 6.10 | 0.014000 | 0.025700 | 0.90 | 0.007958 | 0.016674 | 0.94 | 0.152737 | 0.168011 | 0.97 | 0.526556 | 0.579212 |
| Microtubule-associated protein RP/EB family member 2 | MAPRE2   | Q15555 | 5.39 | 0.033600 | 0.045000 | 1.15 | 0.102117 | 0.136156 | 0.92 | 0.233161 | 0.250222 | 1.26 | 0.010451 | 0.032846 |
| Microtubule-associated protein RP/EB family member 2 | MAPRE2   | Q15555 | 5.41 | 0.021600 | 0.033300 | 1.10 | 0.185761 | 0.215092 | 0.81 | 0.096493 | 0.128658 | 1.35 | 0.005156 | 0.028358 |
| Myosin 9                                             | MYH9     | P35579 | 5.33 | 0.000584 | 0.006000 | 0.82 | 0.052255 | 0.082115 | 0.63 | 0.000152 | 0.001359 | 1.32 | 0.009952 | 0.032846 |
| Myosin 9                                             | MYH9     | P35579 | 5.33 | 0.008660 | 0.019300 | 0.78 | 0.058190 | 0.088288 | 0.63 | 0.002497 | 0.006463 | 1.25 | 0.071113 | 0.148999 |
| Myosin regulatory light polypeptide 9                | MYL9     | P24844 | 4.72 | 0.013500 | 0.025700 | 1.09 | 0.171331 | 0.203745 | 1.23 | 0.012816 | 0.020885 | 0.88 | 0.113500 | 0.215470 |
| Nucleosome assembly protein 1-like 1                 | NAP1L1   | P55209 | 4.67 | 0.007260 | 0.018600 | 1.02 | 0.501883 | 0.525782 | 1.23 | 0.000849 | 0.004014 | 0.83 | 0.002494 | 0.021971 |
| Proteasome activator complex subunit 1               | PSME1    | Q06323 | 5.81 | 0.000304 | 0.004730 | 1.17 | 0.000089 | 0.001949 | 1.15 | 0.006748 | 0.012909 | 1.02 | 0.740964 | 0.795181 |
| Protein disulfide-isomerase A1                       | P4HB     | P07237 | 4.77 | 0.000004 | 0.004660 | 1.11 | 0.001945 | 0.010699 | 1.24 | 0.000003 | 0.000136 | 0.90 | 0.007801 | 0.031830 |
| Protein disulfide-isomerase A1                       | P4HB     | P07237 | 4.79 | 0.001170 | 0.006000 | 1.10 | 0.001415 | 0.008894 | 1.14 | 0.002481 | 0.006463 | 0.96 | 0.446821 | 0.561718 |
| Protein disulfide-isomerase A1                       | P4HB     | P07237 | 4.78 | 0.002140 | 0.008100 | 1.08 | 0.002351 | 0.011491 | 1.11 | 0.003580 | 0.008132 | 0.98 | 0.499015 | 0.577651 |
| Protein disulfide-isomerase A6                       | PDIA6    | Q15084 | 5.12 | 0.000638 | 0.006000 | 1.07 | 0.001069 | 0.007837 | 1.13 | 0.001377 | 0.004328 | 1.00 | 0.420819 | 0.561718 |
| Ras-related protein Rab-27B                          | RAB27B   | O00194 | 5.00 | 0.000992 | 0.006000 | 0.91 | 0.133365 | 0.172590 | 1.12 | 0.143911 | 0.162361 | 0.81 | 0.006314 | 0.030868 |
| Translationally-controlled tumor protein             | TPT1     | P13693 | 4.84 | 0.024900 | 0.036100 | 1.08 | 0.101030 | 0.136156 | 1.17 | 0.008013 | 0.014690 | 0.93 | 0.122426 | 0.215470 |
| Tropomyosin alpha-3 chain                            | TPM3     | P06753 | 4.75 | 0.036100 | 0.046200 | 0.95 | 0.697871 | 0.697871 | 1.28 | 0.006184 | 0.012369 | 0.74 | 0.001367 | 0.021971 |
| Vinculin                                             | VCL      | P18206 | 6.00 | 0.014200 | 0.025700 | 1.25 | 0.004823 | 0.011790 | 1.32 | 0.051638 | 0.071002 | 0.95 | 0.963131 | 0.963131 |
| Vinculin                                             | VCL      | P18206 | 6.10 | 0.000164 | 0.004660 | 1.37 | 0.000060 | 0.001949 | 1.45 | 0.003776 | 0.008132 | 0.94 | 0.884945 | 0.905525 |
| Vinculin                                             | VCL      | P18206 | 6.20 | 0.014600 | 0.025900 | 1.26 | 0.003444 | 0.011658 | 1.23 | 0.122439 | 0.153923 | 1.03 | 0.485139 | 0.577651 |
| Vinculin                                             | VCL      | P18206 | 5.63 | 0.015300 | 0.026700 | 0.75 | 0.022375 | 0.041020 | 1.03 | 0.702856 | 0.719202 | 0.73 | 0.024526 | 0.071943 |

Abbreviations: LA – lupus anticoagulant; TE – thromboembolism;

**Supplementary Table 2: Altered platelet protein abundances between LA-positive patients receiving antithrombotic agents and LA-positive patients without antithrombotic agents.**

| Protein name                                         | Gene name | Antithrombotic agent (n=28)/<br>No antithrombotic agent (n=19) |                      |                                   |
|------------------------------------------------------|-----------|----------------------------------------------------------------|----------------------|-----------------------------------|
|                                                      |           | Average fold change                                            | p-value [unadjusted] | p-value [adjusted for thrombosis] |
| Microtubule-associated protein RP/EB family member 2 | MAPRE2    | 0.62                                                           | 0.007                | 0.211                             |
| Vinculin                                             | VCL       | 1.05                                                           | 0.021                | 0.426                             |
| Fibrinogen beta chain                                | FGB       | 0.99                                                           | 0.024                | 0.787                             |
| Nucleosome assembly protein 1-like 1                 | NAP1L1    | 1.07                                                           | 0.033                | 0.281                             |
| Actin                                                | ACTB      | 1.07                                                           | 0.043                | 0.300                             |
| 60 kDa heat shock protein                            | HSPD1     | 0.93                                                           | 0.049                | 0.215                             |

Abbreviations: LA – lupus anticoagulant

**Supplementary Table 3: Altered platelet protein abundances between LA-positive patients with a history of venous TE and LA-positive patients with a history of arterial TE analyzed by 2D-DIGE.**

| Protein name                          | Gene name | LA+VTE+ (n=22)/<br>LA+ATE+ (n=7) |                      |
|---------------------------------------|-----------|----------------------------------|----------------------|
|                                       |           | Average fold change              | p-value [unadjusted] |
| Apolipoprotein A-I                    | APOA1     | 0.67                             | 0.0003               |
| Bridgin integrator 2                  | BIN2      | 1.44                             | 0.0031               |
| Myosin regulatory light polypeptide 9 | MYL9      | 1.30                             | 0.0154               |
| Tropomyosin alpha-3 chain             | TPM3      | 1.26                             | 0.0169               |
| Leukocyte elastase inhibitor          | SERPINB1  | 0.90                             | 0.0386               |

Abbreviations: LA – lupus anticoagulant; TE – thromboembolism; ATE – arterial thromboembolism; VTE – venous thromboembolism

**Supplementary Figures:**

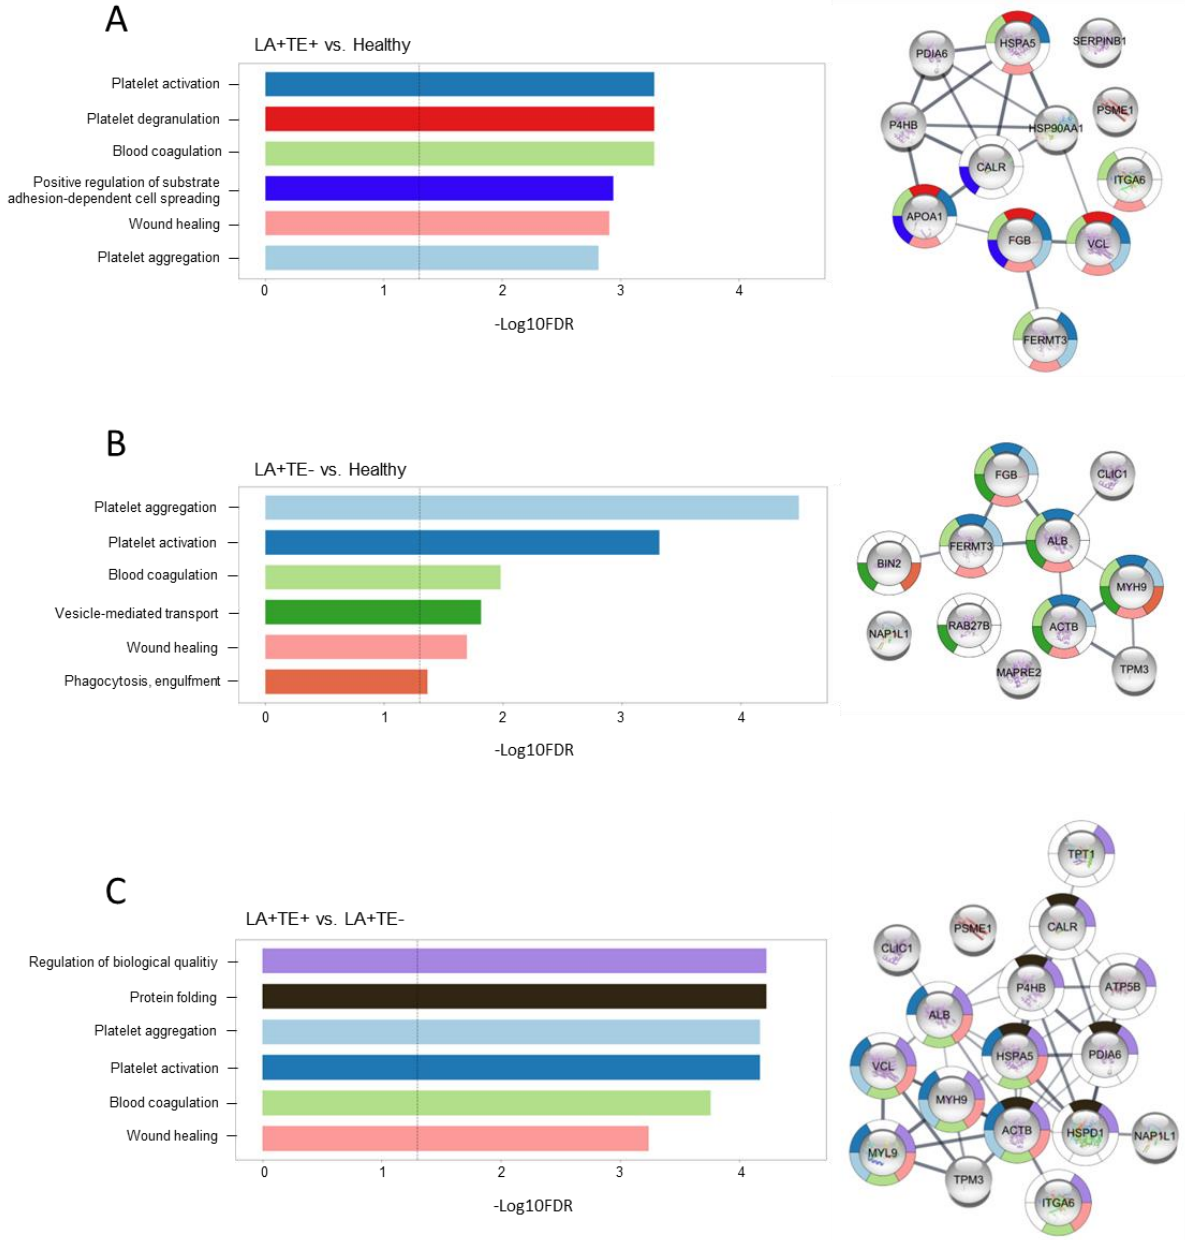

**Supplementary Fig. 1: STRING pathway analysis of altered platelet proteins between (A) LA+TE+ patients vs. healthy controls, (B) LA+TE- patients vs. healthy controls and (C) LA+TE+ patients vs. LA+TE- patients.** The network view summarizes the network of predicted associations for the proteins (nodes) differentially expressed in each comparison. The edges represent the predicted functional associations. The thickness of the edge indicates the degree of confidence prediction of the interaction. The enrichment graphs depict the 6 most significantly enriched GO Biological Processes terms (FDR < 0.05, dashed line) for each comparison studied. Each term is represented by a specific color, and the nodes annotated with that term show the respective color. Abbreviations: LA – lupus anticoagulant; TE – thromboembolism; FDR – false discovery rate

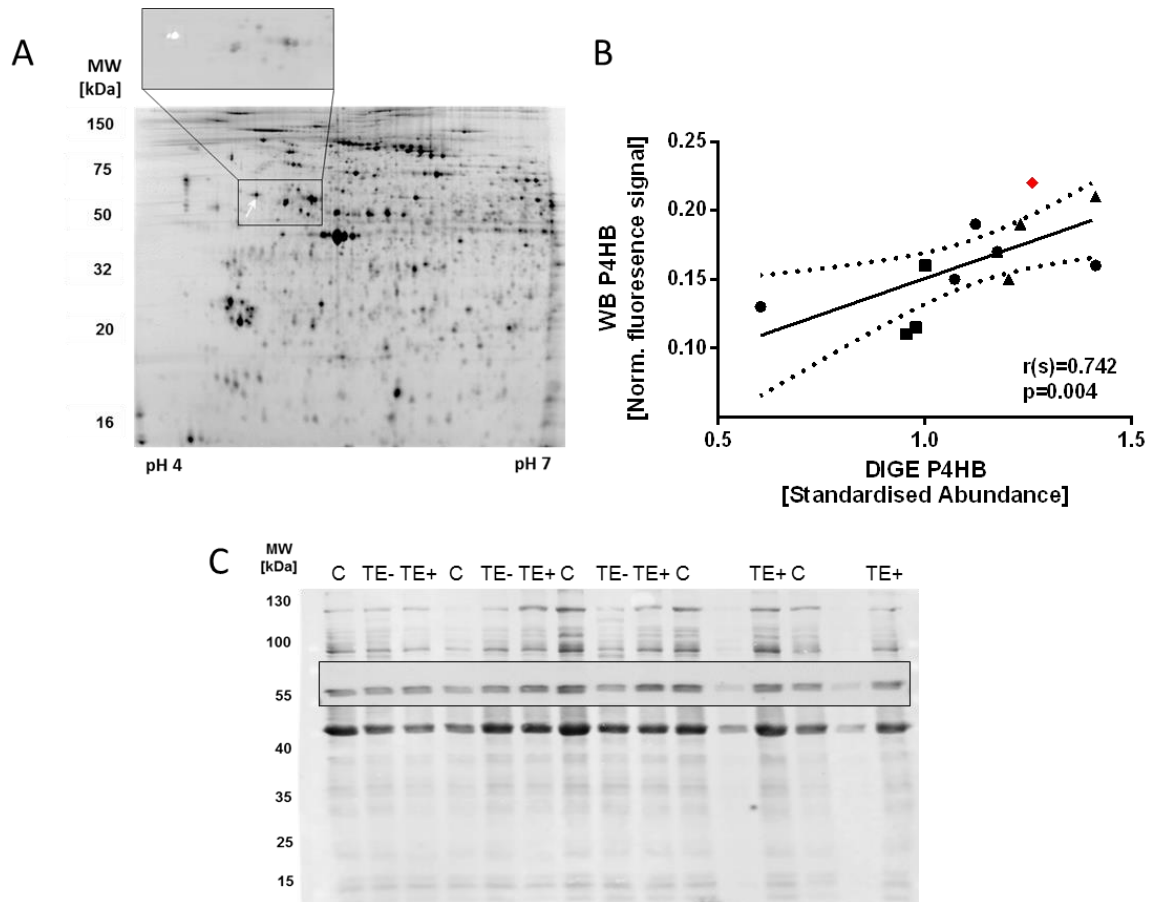

**Supplementary Fig. 2: Two-dimensional and quantitative 1-D WB analysis of P4HB.** (A) Representative 2-D WB image of platelet P4HB probed with monoclonal protein disulfide-isomerase A1 (P4HB), clone RL90 antibody. 36  $\mu$ g Cy2-labeled protein was applied to IEF on a 24 cm pH 4-7 IPG strip. Proteins were separated by a 11.5% SDS-PAGE according to their molecular weight. Antibody fluorescence signals were detected with a Typhoon FLA 9500 imager (Protein of interest is highlighted with a white arrow). The cut-out region shows an overlay from Cy2-labeled whole protein stain and specific WB signal, where immune-identified proteins are displayed as white spots. (B) Scatter blot and correlation analysis of P4HB protein levels measured by 2D DIGE and qWB analysis (Spearman's rank correlation coefficient). (C) Representative 1-D WB image from P4HB. Twelve  $\mu$ g of platelet proteins from LA+TE+ patients (n=5), LA+TE- patients (=3) and healthy controls (n=5) were applied per lane and separated by a 11.5% SDS-PAGE. The specific pan-P4HB antibody recognized one protein band with molecular weight of about 58 kDa, well corresponding to the positions of the P4HB spot found by 2D-DIGE analysis. Ruthenium-based whole-protein stain of blotted proteins was performed to assess equal protein application. The image section shows the whole-protein stain and the overlay of the antibody signals detected by fluorescence signal (Cy5). Healthy controls [C], LA+ TE- patients without TE [TE-] and LA+ patients with TE [TE+]; Abbreviations: WB – western blot; 2D-DIGE – two-dimensional differential in-gel electrophoresis; IEF – isoelectric focusing; MW – molecular weight; kDa – kilodalton; TE – thromboembolism; LA – lupus anticoagulant

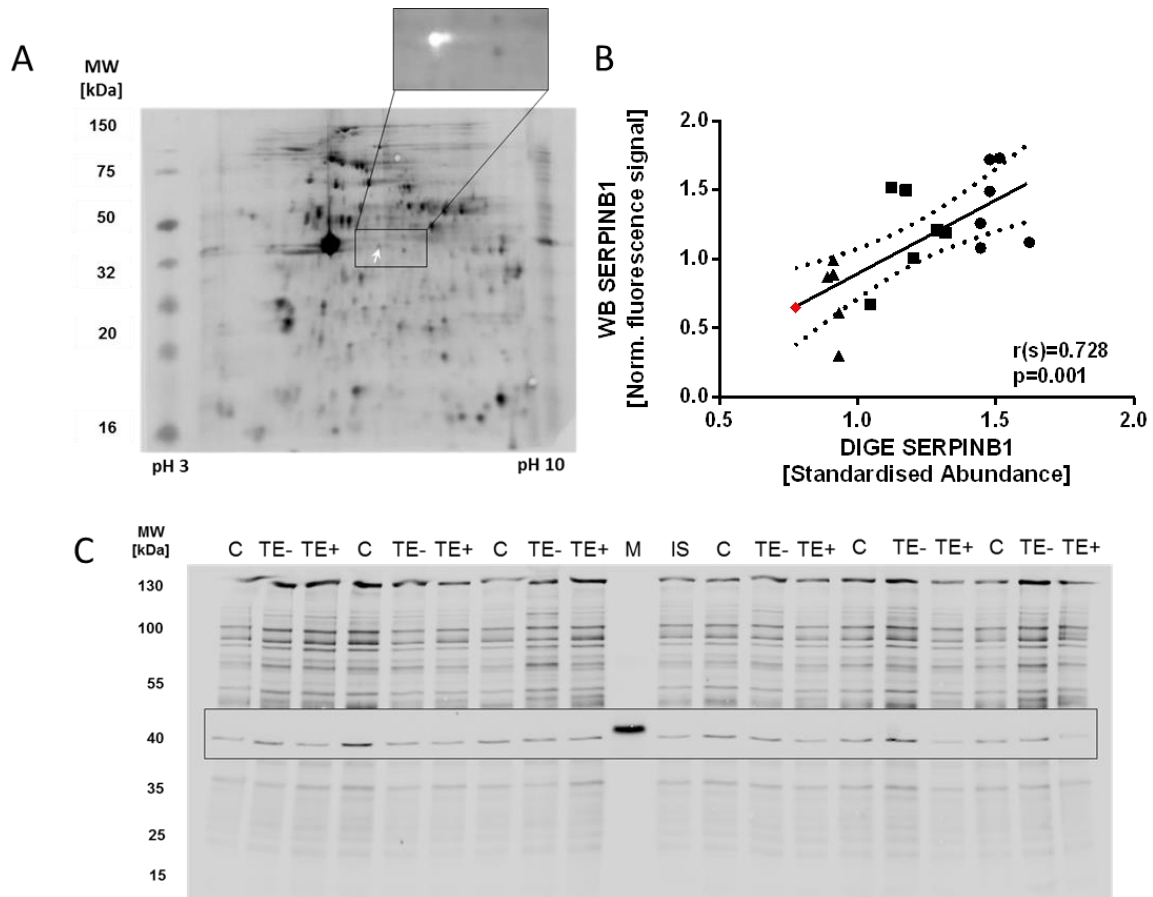

**Supplementary Fig. 3: Two-dimensional and quantitative 1-D WB analysis of SERPINB1.** (A) Representative 2-D WB image of platelet SERPINB1 probed with monoclonal leukocyte elastase inhibitor antibody clone EPR13305(B) antibody. 36  $\mu\text{g}$  Cy2-labeled protein were applied to IEF on a 12 cm pH 3–10 IPG strip. Proteins were separated by a 11.5% SDS-PAGE according to their molecular weight. Antibody fluorescence signals were detected with a Typhoon FLA 9500 imager (Protein of interest is highlighted with a white arrow). The cut-out region shows an overlay from Cy2-labeled whole protein stain and specific WB signal, where immune-identified proteins are displayed as white spots. (B) Scatter blot and correlation analysis of Scatter blot and correlation analysis of SERPINB1 protein levels measured by 2D DIGE and qWB analysis (Spearman's rank correlation coefficient). (C) Representative 1-D WB image from SERPINB1. Twelve  $\mu\text{g}$  of platelet proteins from LA+TE+ patients (n=6), LA+TE- patients (=6) and healthy controls (n=6) were applied per lane and separated by a 11.5% SDS-PAGE. The specific pan-SERPINB1 antibody recognized one protein band with molecular weight of about 43 kDa, well corresponding to the positions of the SERPINB1 spot found by 2D-DIGE analysis. Ruthenium-based whole-protein stain of blotted proteins was performed to assess equal protein application. The image section shows the whole-protein stain and the overlay of the antibody signals detected by fluorescence signal (Cy5). Healthy controls [C], LA+ TE- patients without TE [TE-] and LA+ patients with TE [TE+]; M – marker, IS – internal standard for standardization. Abbreviations: WB – western blot; 2D-DIGE – two-dimensional differential in-gel electrophoresis; IEF – isoelectric focusing, MW – molecular weight; kDa – kilodalton; TE – thromboembolism; LA – lupus anticoagulant
